# Supplementary material
Source: Springer Nature journal article supplement (https://www.springermedizin.de/resource/supplementary/13054_2011_475_MOESM3_ESM.pdf/9708520)

Daily peak body temperature ( C )

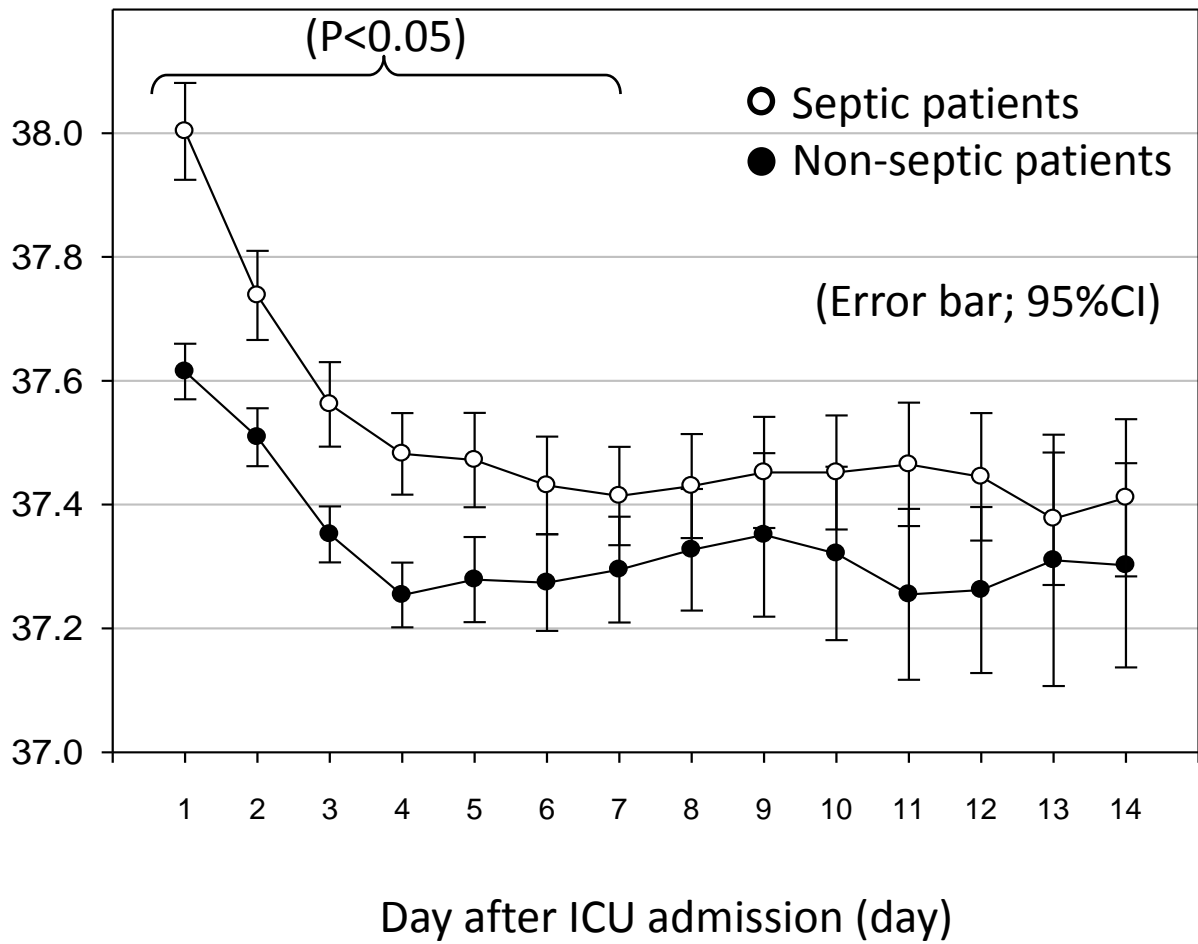

Supplement: MOESM3 [file 9708520]
